# Supplementary material for: VA FitHeart, a Mobile App for Cardiac Rehabilitation: Usability Study
Source: PubMed Central journal article supplement (PMC5789161; doi:10.2196/humanfactors.8017), 2018-01-15
Supplement: humanfactors_v5i1e3_app1.pdf [file humanfactors_v5i1e3_app1.pdf]

## Appendix 1. Mobile Application Use Questionnaire

| <b>Mobile Application Use Questionnaire</b>                                                    |                         |
|------------------------------------------------------------------------------------------------|-------------------------|
| <b>Question</b>                                                                                | <b>Factors</b>          |
| I find using the mobile application useful in my daily life.                                   | Performance Expectancy  |
| Using the mobile application increases my chances of achieving things that are important to me | Performance Expectancy  |
| Using the mobile application helps me accomplish things more quickly                           | Performance Expectancy  |
| People who are important to me think that I should use the mobile application                  | Social Influence        |
| People who influence my behavior think that I should use the mobile application                | Social Influence        |
| People whose opinions that I value prefer that I use the mobile application                    | Social Influence        |
| I have the resources necessary to use the mobile application                                   | Facilitating Conditions |
| I have the knowledge necessary to use the mobile application                                   | Facilitating Conditions |
| The mobile application is compatible with other technologies I use                             | Facilitating Conditions |
| I can get help from others when I have difficulties using the mobile application               | Facilitating Conditions |
| Using the mobile application is enjoyable                                                      | Hedonic Motivation      |
| The use of the mobile application has become a habit for me                                    | Habit                   |
| I intend to continue using the mobile application in the future                                | Behavioral Intention    |
| I will always try to use the mobile application in my daily life                               | Behavioral Intention    |
| I plan to continue to use the mobile application frequently                                    | Behavioral Intention    |
